# Supplementary material
Source: bioRxiv or medRxiv preprint supplement (https://www.biorxiv.org/highwire/filestream/140878/field_highwire_adjunct_files/0/470393-1.pdf)
Supplement: Supplementary file [file 470393-1.pdf]

**Table 1 – miR-181 targets identification in RGC *Xenopus laevis* isolated axons**

Table 1: Predicted miR-181-5p targets, detectable within the axonal transcriptome, ranked by TotalScore. The final candidate selection is based on the 20% best ranked candidates which were conserved as targets in human and mice, filtered by the Reactome axon guidance pathway (R-HSA-422475) and the Reactome integrin cell surface interactions pathway (R-HSA-216083).

| Column header          | Comment                                                                                                                                                     |
|------------------------|-------------------------------------------------------------------------------------------------------------------------------------------------------------|
| TCS                    | Total Context Score from miR-181a-5p targets predicted using TargetScan 6                                                                                   |
| 8mer-1a                | Type of miR-181-5p MRE (miRNA responsive element)                                                                                                           |
| 7mer-m8                |                                                                                                                                                             |
| 7mer-1a                |                                                                                                                                                             |
| TS.a-5p                | Total sites of miR-181a-5p MREs in <i>Xenopus</i>                                                                                                           |
| TS.a-1-3p              | Total sites of miR-181a-1-3p MREs in <i>Xenopus</i>                                                                                                         |
| TS.a-2-3p              | Total sites of miR-181a-2-3p MREs in <i>Xenopus</i>                                                                                                         |
| TS.miR                 | Total sites of miR-181a MREs in <i>Xenopus</i>                                                                                                              |
| TS.3p                  | Total sites of miR-181a-3p MREs in <i>Xenopus</i>                                                                                                           |
| h-TS-miR               | Human total number of miR-181 MREs                                                                                                                          |
| h-TS-5p                | Human total number of miR-181-5p MREs                                                                                                                       |
| h-TS-3p                | Human total number of miR-181-3p MREs                                                                                                                       |
| tc-h-ID                | miR-181 TargetScantargeting conserved in human based on entrezID<br>> yes or no                                                                             |
| tc-h-Gn                | miR-181 TargetScantargeting conserved in human based on gene name<br>> yes or no                                                                            |
| m-TS-miR               | Mice total number of miR-181 MREs                                                                                                                           |
| m-TS-5p                | Mice total number of miR-181-5p MREs                                                                                                                        |
| m-TS-3p                | Mice total number of miR-181-3p MREs                                                                                                                        |
| tc-m-ID                | miR-181 TargetScantargeting conserved in mice based on entrezID<br>> yes or no                                                                              |
| tc-m-Gn                | miR-181 TargetScantargeting conserved in mice based on gene name<br>> yes or no                                                                             |
| Integrin_Reactome      | Transcripts reported in the Reactome integrin cell surface interactions pathway (R-HSA-216083)<br>>yes (if it is reported in the selected Reactome pathway) |
| Axon-guidance_Reactome | Transcripts reported in the Reactome axon guidance pathway (R-HSA-422475)<br>>yes (if it is reported in the selected Reactome pathway)                      |
